# Supplementary material for: Long-lived lung megakaryocytes contribute to platelet recovery in thrombocytopenia models
Source: JCI journal article supplement (doi:10.1172/jci181111), 2024-09-19
Supplement: sd1 [file 1]

# Supplemental Figures

# Supplementary Figure 1

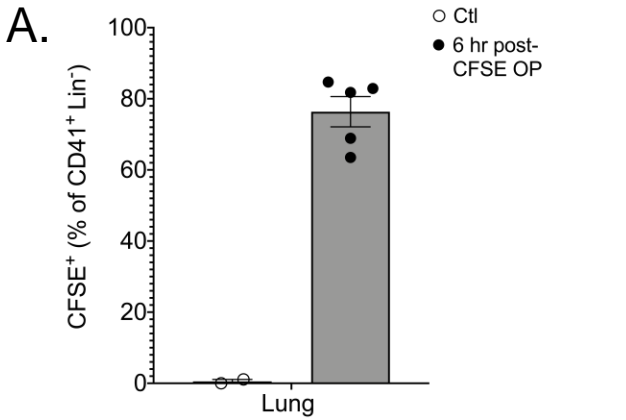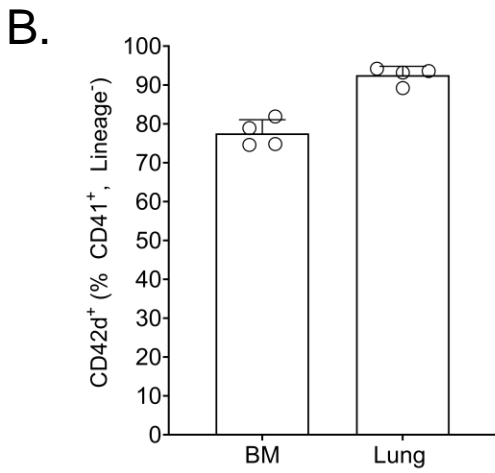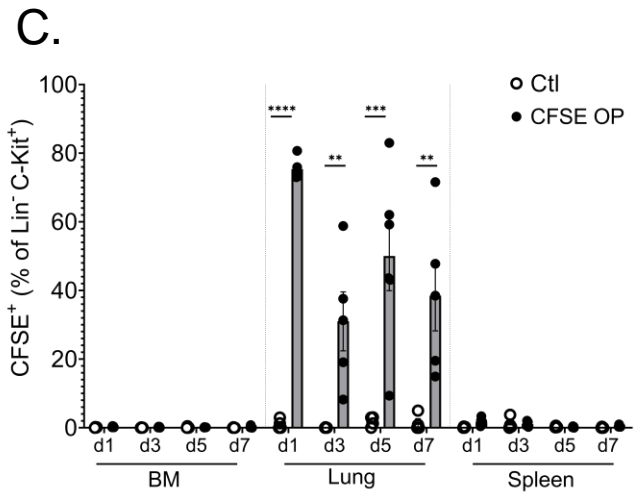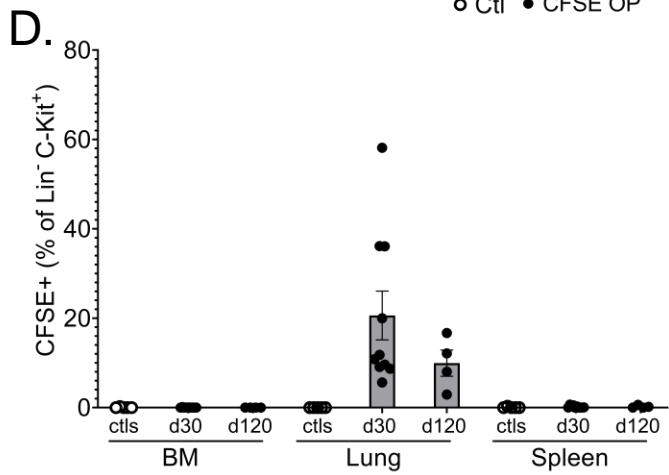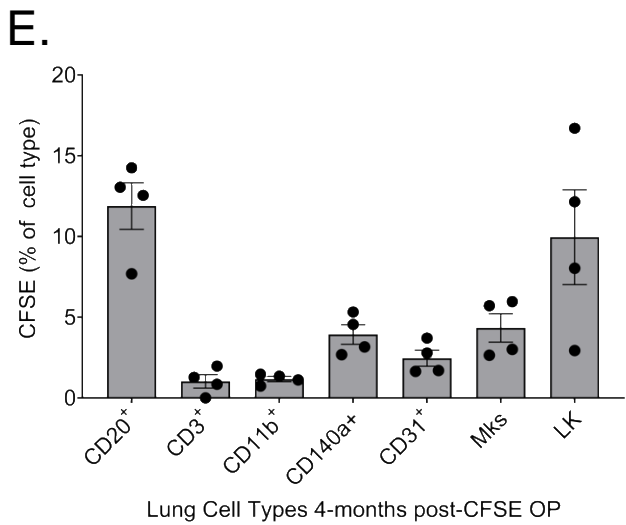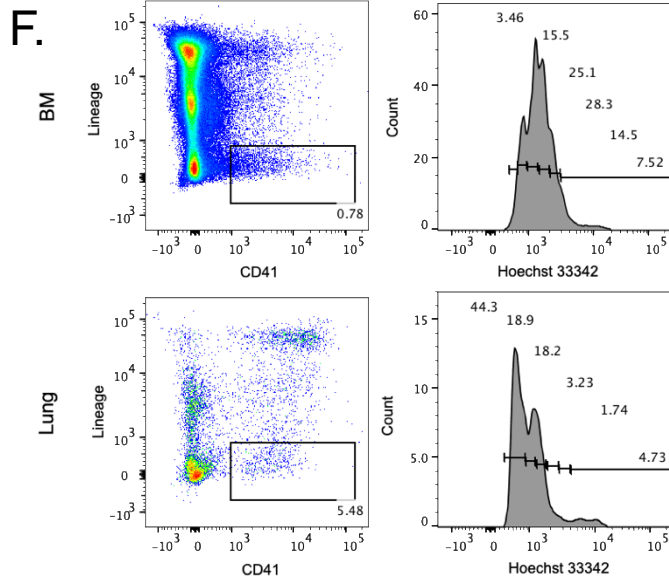

G.

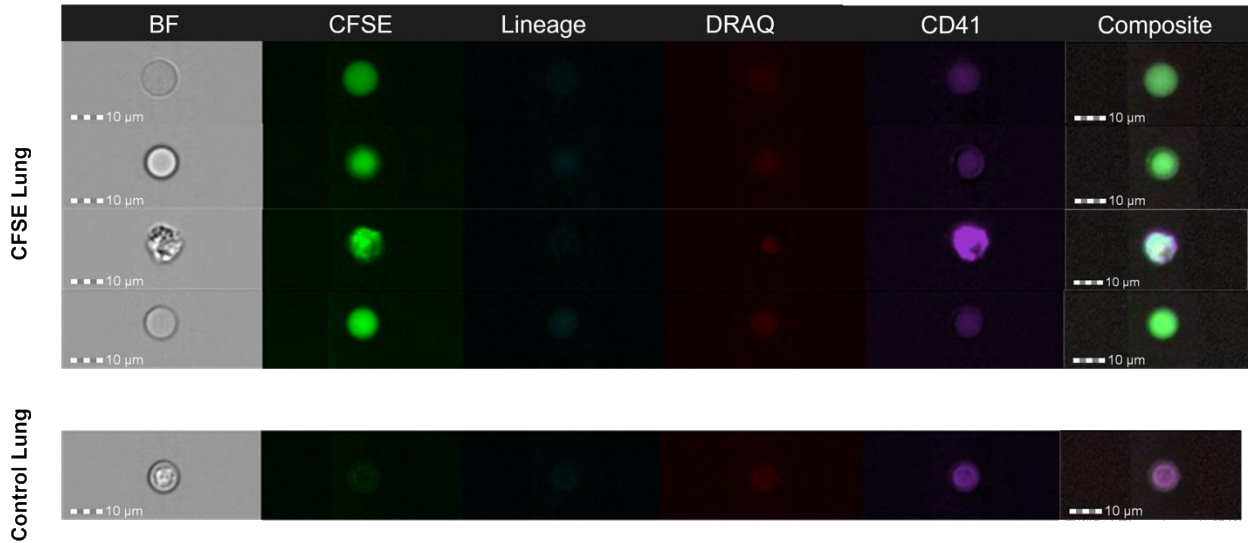

Supplemental Figure 1. A) CFSE labeling six hours post administration in CFSE or control mice. B) CD42d labeling of CD41<sup>+</sup>, Lineage<sup>-</sup> cells from lung and BM using flow cytometry. C) CFSE oropharyngeal (OP) dye labeled Lineage<sup>-</sup> c-kit<sup>+</sup> cells (LK) from d1-d7 (Two-way ANOVA with Tukey's Multiple Comparison Tests). D) CFSE OP dye labeled LK cells d30 or d120 later (Multiple *t*-tests with Holm-Sidak multiple comparison correction test). E) CFSE labeling of multiple cell types 4 months post-CFSE. F) Representative flow cytometry gating for CD41<sup>+</sup>, Lineage<sup>-</sup> cells and Hoescht 33342 staining for ploidy gates are shown (2N, 4N, 8N, 16N, ≥32N from left to right). G. Representative imaging flow cytometry of lung CFSE dye in CD41<sup>+</sup>, Lineage<sup>-</sup> cells from CFSE-OP treated mice (first four rows represent separate mice) or control mouse (bottom row).

# Supplementary Figure 2

A.

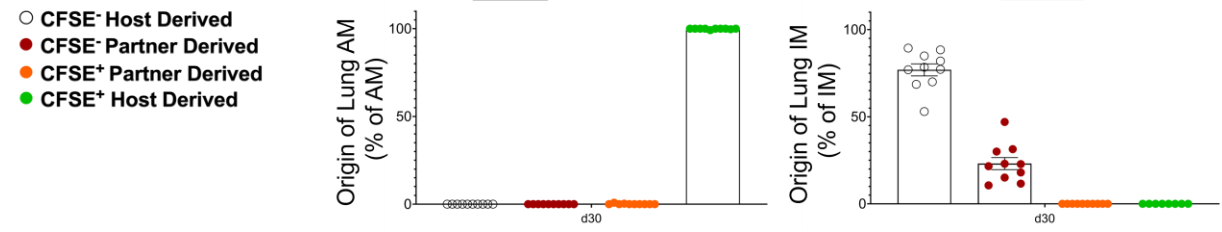

B.

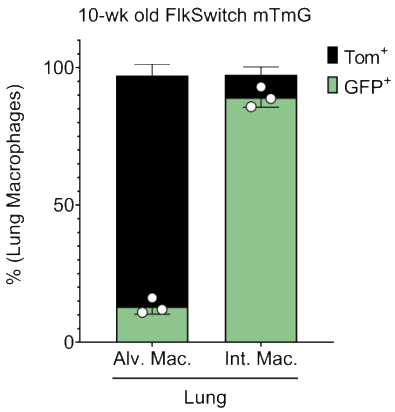

C.

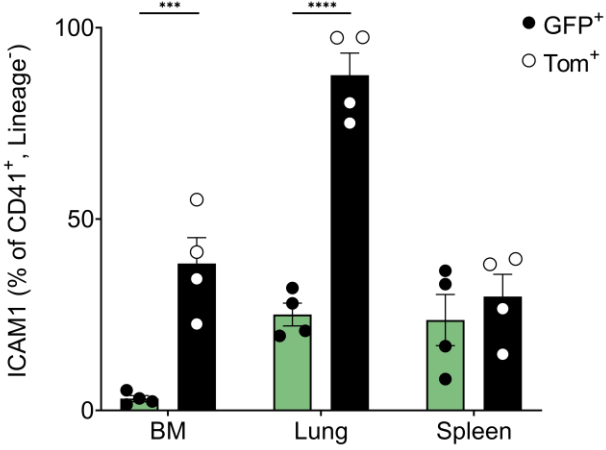

Supplemental Figure 2. A) One month after parabiosis surgery, all AMs remained CFSE<sup>+</sup>, host-derived and IMs were replaced by CFSE<sup>-</sup> host-derived cells with 23% from the CFSE<sup>-</sup> partner, indicating circulatory replacement of IMs from the partner parabiont. No IMs were CFSE<sup>+</sup> from the partner (orange) or host (green). B) GFP and Tomato expressing alveolar and interstitial macrophages as % of lung macrophages in 10-week-old FlkSwitch mTmG mice. C) ICAM1 expression on CD41<sup>+</sup>, Lineage<sup>-</sup> GFP or Tomato cells in in BM, lung and spleen. (Two-way ANOVA with Sidak multiple comparison test correction shown for B and C).

# Supplementary Figure 3

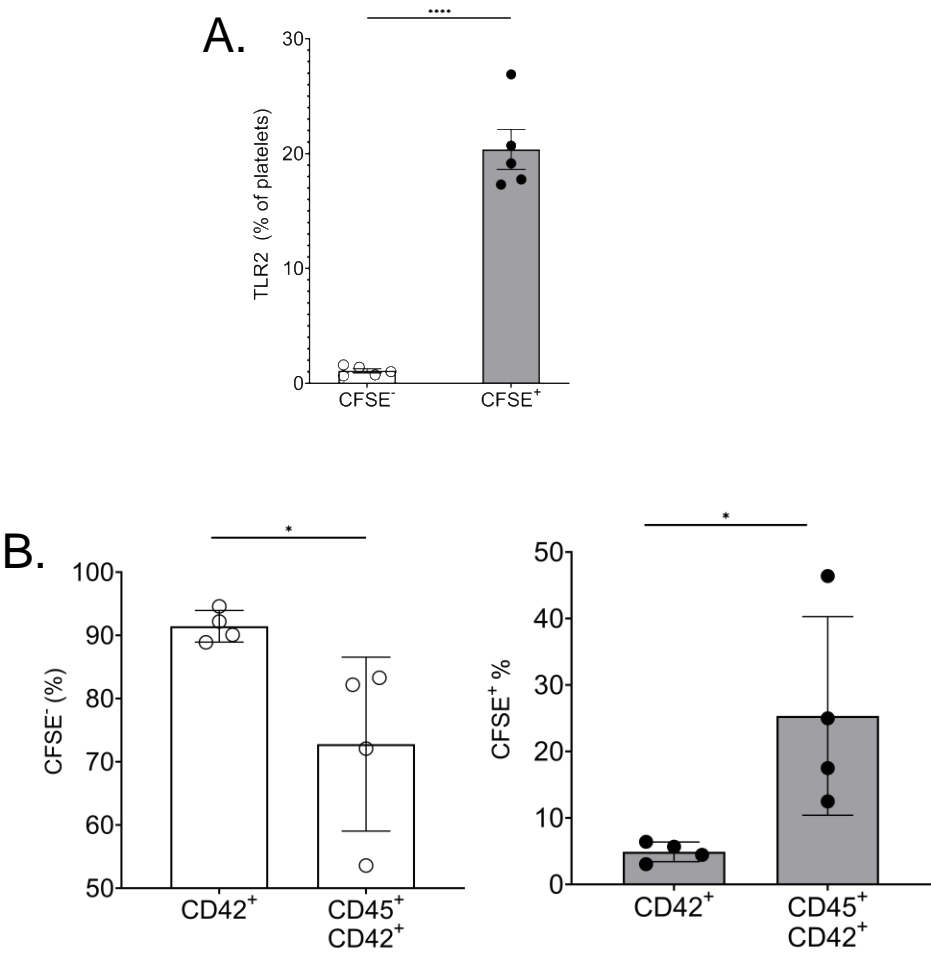

Supplemental Figure 3. A) Platelet TLR2 expression measured using flow cytometry in CFSE<sup>+</sup> or CFSE<sup>-</sup> platelets. B) Percent CFSE<sup>-</sup> (left panel) or percent CFSE<sup>+</sup> (right panel) of CD42<sup>+</sup> platelets or CD45<sup>+</sup> CD42<sup>+</sup> platelet leukocyte aggregates in peripheral blood (unpaired, two-tailed *t*-tests shown for A and B).

# Supplementary Figure 4

## B.

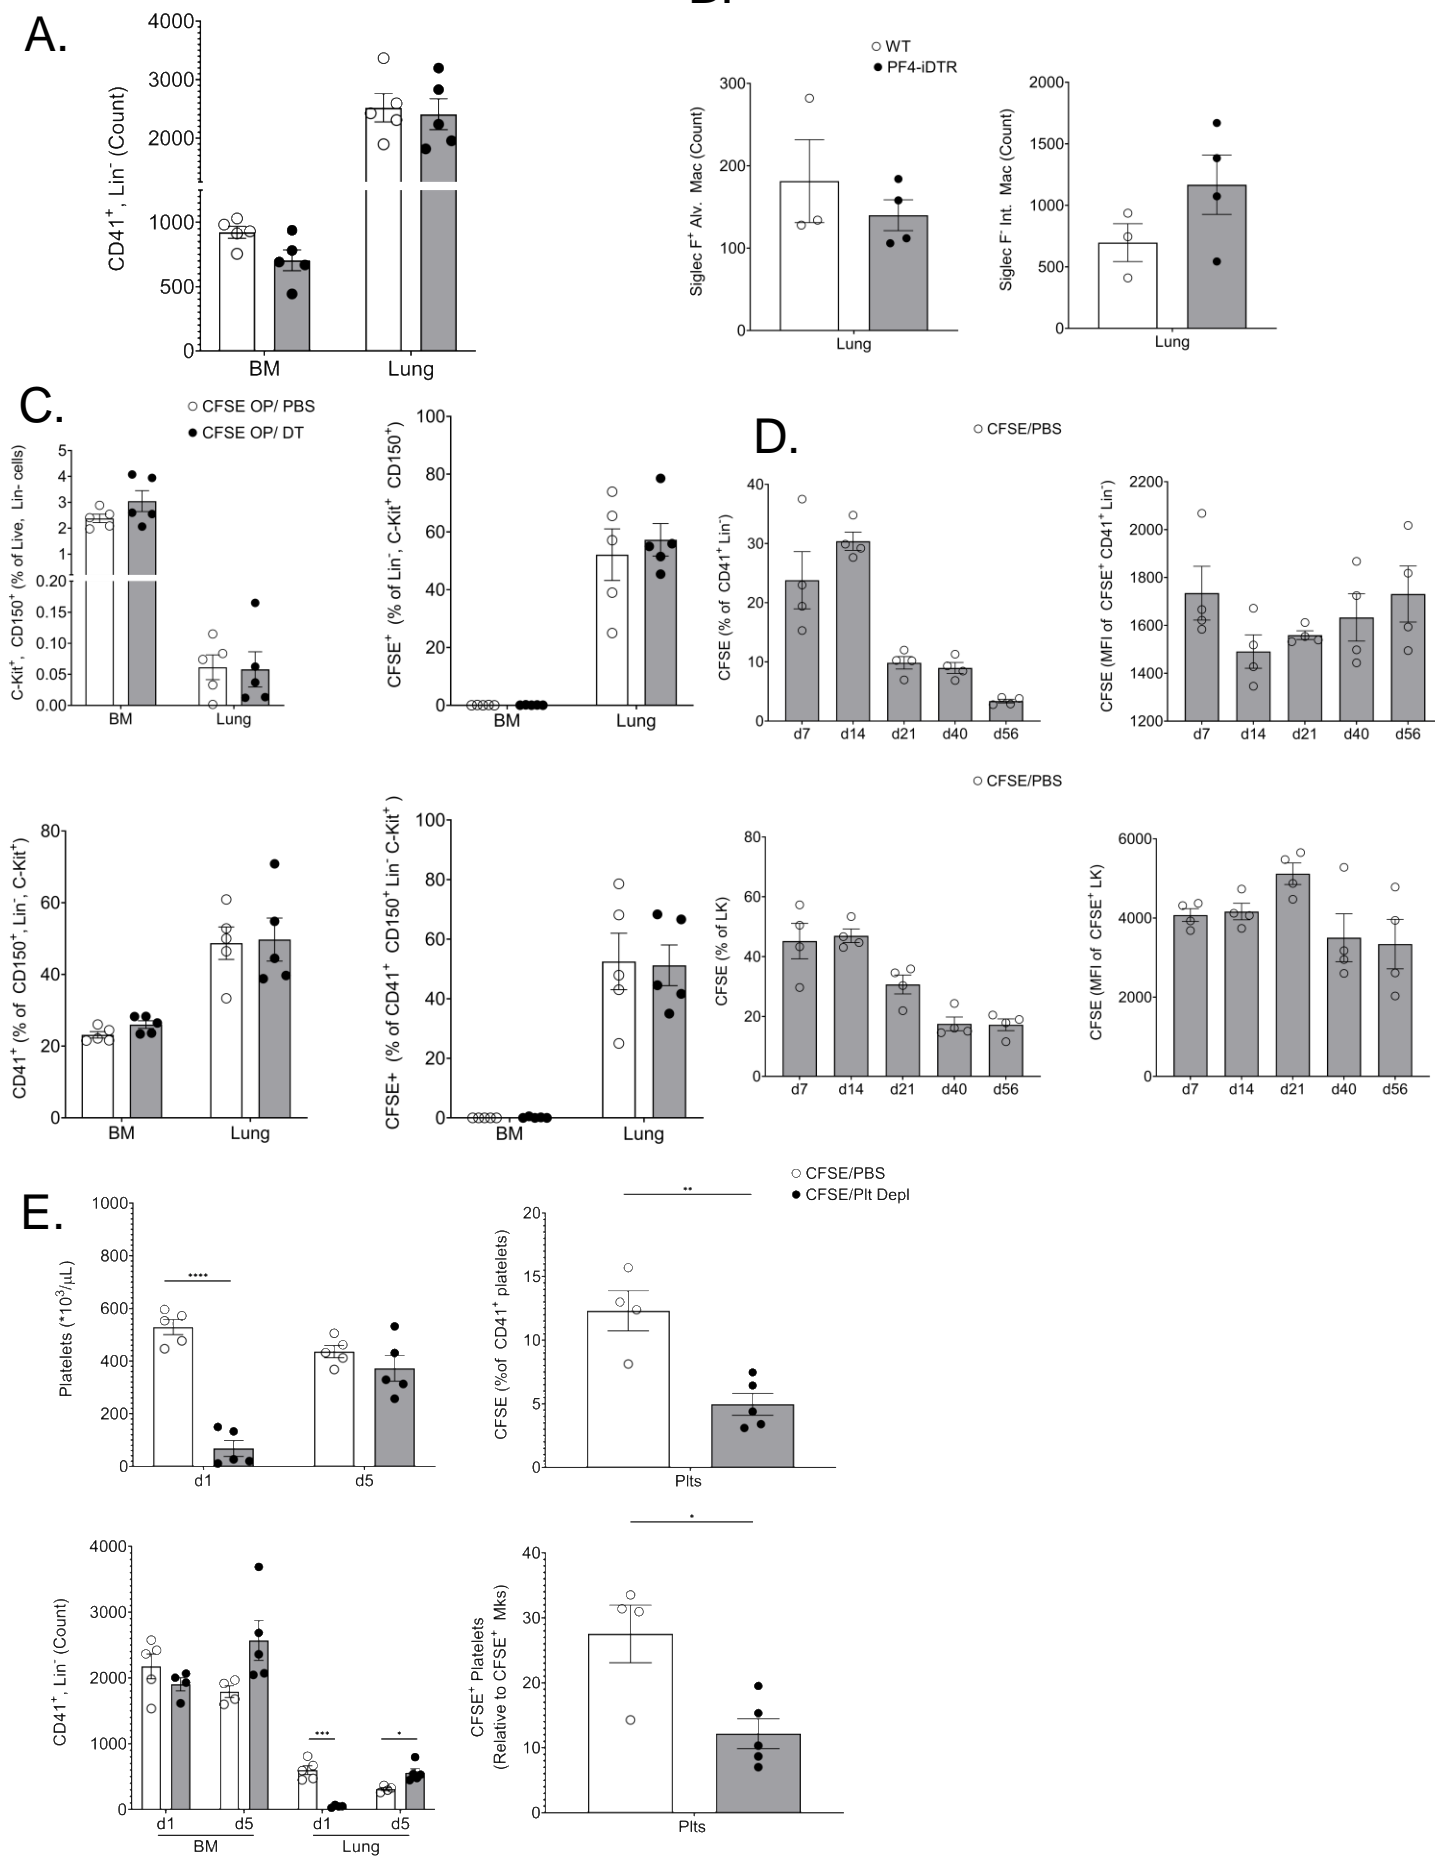

Supplemental Figure 4. A) Numbers of BM and Lung Mks on d3 post-LPS. B) Numbers of Siglec-F<sup>+</sup> alveolar lung macrophages (Alv. Mac) in left panel and Siglec-F<sup>-</sup> interstitial lung macrophages on right panel in control and DT-treated PF4-iDTR mice on d2. C) C-Kit<sup>+</sup>, CD150<sup>+</sup>, Lin<sup>-</sup> cells (upper left) and their CFSE % (upper right) and CD41<sup>+</sup> CD150<sup>+</sup> LK (bottom left) and their CFSE % (bottom right) in control and DT-treated iDTR mice. D) The change in CFSE<sup>+</sup> % (upper left) and MFI (upper right) of CD41<sup>+</sup> Lineage<sup>-</sup> cells and LK d1-d56 (bottom left and right) in the lung. E) Platelet counts on d1 and d5 in control or platelet-depleted (Ab-mediated) mice (upper left panel); new CFSE<sup>+</sup> platelets percent of total platelets (upper right panel); new CFSE<sup>+</sup> platelets normalized to lung CFSE<sup>+</sup> Mks (bottom right panel); CD41<sup>+</sup>, Lineage<sup>-</sup> numbers (bottom left panel).

# Supplementary Figure 5

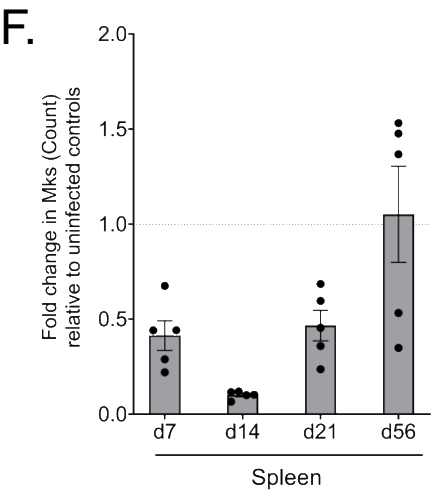

Supplemental Figure 5. Fold change in spleen Mks relative to uninfected controls on d7, 14, 21, and 56 post-infection with PYnL.
